# Supplementary material
Source: PubMed Central journal article supplement (PMC4388746)
Supplement: supp_WNL.0000000000001420_Tables_e-1-3.pdf [file supp_WNL.0000000000001420_Tables_e-1-3.pdf]

**Table e-1: EBNA2 alleles and HLA aptotypes (a complete HLA typing was obtained in a random subset of the entire sample) in MS and HD.**

| n              | MS/HD | F/M | aa134  | aa236  | aa245  | aa 256 | aa267  | Alleles | HLA-A    | HLA-A    | HLA-B    | HLA-B    | HLA-Cw    | HLACw     | HLA-DR    | HLA-DR    |
|----------------|-------|-----|--------|--------|--------|--------|--------|---------|----------|----------|----------|----------|-----------|-----------|-----------|-----------|
|                |       | --- | L(CTT) | T(ACC) | P      | D      | T      | B95-8   | ---      | ---      | ---      | ---      | ---       | ---       | ---       | ---       |
| 1              | HD1   | F   | L(CTT) | T(ACC) | P      | D      | T      | 1.3B    | A24*2402 | A31*3101 | B51*5101 | B51*5101 | Cw15*1502 | Cw15*1502 | DR16*1601 | DR12*1201 |
| 2              | HD2   | F   | L(CTT) | T(ACC) | P      | D      | T      | 1.3B    | A26*2601 | A11*1101 | B7*0702  | B37*3701 | Cw6*0602  | Cw7*0702  | DR10*1001 | DR11*1101 |
| 3 <sup>a</sup> | HD3-1 | M   | L(CTT) | T(ACC) | P      | D      | T      | 1.3B    | A2*0201  | A2*0201  | B40*4001 | B51*5101 | Cw15*1503 | Cw12*1202 | DR1*0101  | DR10*1001 |
|                | HD3-2 |     | L(CTT) | T(ACC) | P      | D      | T      | 1.3B    |          |          |          |          |           |           |           |           |
| 4              | HD4   | F   | L(CTT) | T(ACC) | P      | D      | T      | GD1     | A24*2402 | A33*3301 | B8*0801  | B44*4401 | Cw6*0602  | Cw7*0702  | DR3*0301  | DR11*1101 |
| 5 <sub>a</sub> | HD5-1 | M   | L(CTG) | T(ACT) | P      | N      | I      | 1.2     | A2*0201  | A26*2601 | B18*1801 | B38*3801 | Cw5*0501  | Cw12*1202 | DR1*0101  | DR17*0301 |
|                | HD5-2 |     | L(CTG) | T(ACT) | P      | N      | I      | 1.2     |          |          |          |          |           |           |           |           |
|                | HD5-3 |     | no seq | T(ACT) | P      | D      | I      | 1.2     |          |          |          |          |           |           |           |           |
| 6              | HD6   | M   | L(CTT) | T(ACC) | P      | D      | T      | GD1     | A2*0201  | A2*0201  | B18*1801 | B51*5101 | Cw14*1402 | Cw12*1202 | DR11*1101 | DR11*1103 |
| 7 <sub>a</sub> | HD7-1 | M   | L(CTG) | T(ACT) | T      | D      | no seq | 1.2     | A2*0201  | A32*3201 | B18*1801 | B50*5001 | Cw7*0701  | Cw6*0602  | DR4*0403  | DR16*1601 |
|                | HD7-2 |     | L(CTT) | T(ACC) | P      | D      | T      | 1.3B    |          |          |          |          |           |           |           |           |
| 8              | HD8   | F   | L(CTT) | T(ACC) | P      | D      | T      | 1.3B    | A2*0201  | A3*0301  | B8*0801  | B55*5501 | Cw3*0301  | Cw7*0702  | DR4*0402  | DR13*1301 |
| 9              | HD9   | F   | L(CTT) | T(ACC) | P      | D      | T      | 1.3B    | A24*2402 | A24*2402 | B35*3504 | B13*1301 | Cw6*0602  | Cw6*0602  | DR7*0701  | DR11*1101 |
| 10             | HD10  | F   | L(CTT) | T(ACC) | P      | D      | T      | 1.3B    | A3*0301  | A26*2601 | B35*3501 | B18*1801 | Cw12*1202 | Cw12*1202 | DR15*1501 | DR11*1103 |
| 11             | HD11  | F   | L(CTT) | T(ACC) | P      | D      | T      | 1.3B    | A1*0101  | A24*2402 | B13*1301 | B35*3502 | Cw4*0401  | Cw6*0602  | DR11*1101 | DR7*0701  |
| 12             | HD12  | M   | L(CTT) | T(ACC) | P      | D      | T      | 1.3B    | A2*0201  | A32*3201 | B15*1501 | B51*5101 | Cw3*0302  | Cw4*0437  | DR16*1601 | DR14*1401 |
| 13             | HD13  | F   | L(CTG) | T(ACT) | T      | N      | I      | 1.2     | A3*0301  | A26*2601 | B7*0702  | B27*2701 | Cw1*0102  | Cw7*0702  | DR8*0801  | DR11*1101 |
| 14             | HD14  | M   | L(CTT) | T(ACC) | P      | N      | T      | 1.3B    | A3*0330  | A26*2601 | B7*0702  | B27*2701 | Cw1*0102  | Cw7*0702  | DR16*1601 | DR11*1101 |
| 15             | HD15  | F   | L(CTT) | T(ACC) | P      | N      | T      | 1.3B    | A3*0301  | A68*6801 | B55*5501 | B53*5301 | Cw4*0401  | Cw1*0102  | DR11*1101 | DR14*1401 |
| 16             | HD16  | F   | L(CTT) | T(ACC) | P      | N      | T      | GD1     | A23*2301 | A24*2402 | B49*4901 | B49*4901 | Cw7*0701  | Cw7*0701  | DR14*1401 | DR13*1301 |
| 17             | HD17  | M   | L(CTG) | no seq | no seq | no seq | no seq | 1.2     | A30*3001 | A30*3001 | B49*4901 | B53*5301 | Cw7*0701  | Cw4*0401  | DR3*0301  | DR1*0124  |
| 18             | HD18  | F   | L(CTT) | T(ACC) | P      | D      | T      | 1.3B    | A2*0201  | A29*2901 | B18*1801 | B35*3501 | Cw1*0104  | Cw12*1221 | DR1*0101  | DR12*1201 |
| 19             | HD19  | M   | L(CTG) | T(ACT) | S      | D      | I      | 1.2     | A2*0201  | A34*3401 | B35*3501 | B8*0801  | Cw7*0701  | Cw4*0401  | DR7*0701  | DR11*1101 |
| 20             | HD20  | F   | L(CTT) | T(ACC) | P      | D      | T      | 1.3B    | A29*2901 | A32*3201 | B27*2703 | B44*4437 | Cw1*0102  | Cw16*1601 | DR7*0701  | DR12*1201 |
| 21             | HD21  | F   | L(CTG) | T(ACT) | P      | D      | I      | 1.2     | A11*1101 | A24*2402 | B49*4901 | B49*4901 | Cw7*0701  | Cw7*0701  | DR11*1101 | DR11*1101 |
| 22             | HD22  | F   | L(CTT) | T(ACC) | P      | D      | T      | 1.3B    | A3*0301  | A33*3301 | B7*0702  | B14*1402 | Cw7*0701  | Cw8*0801  | DR15*1501 | DR1*0101  |

|    |      |   |        |        |   |   |   |      |          |          |          |          |           |          |           |           |
|----|------|---|--------|--------|---|---|---|------|----------|----------|----------|----------|-----------|----------|-----------|-----------|
| 23 | HD23 | F | L(CTT) | T(ACC) | P | N | T | 1.3B | A11*1101 | A32*3201 | B55*5501 | B54*5405 | Cw4*0401  | Cw3*0303 | DR3*0301  | DR7*0701  |
| 24 | HD24 | F | L(CTT) | T(ACC) | P | D | T | 1.3B | A3*0301  | A30*3001 | B15*1501 | B35*3501 | Cw3*0304  | Cw4*0401 | DR4*0402  | DR4*0402  |
| 25 | HD25 | M | L(CTT) | T(ACC) | P | N | T | 1.3B | A2*0201  | A1*0101  | B8*0801  | B51*5101 | Cw14*1402 | Cw7*0701 | DR16*1601 | DR3*0301  |
| 26 | HD26 | F | L(CTT) | T(ACC) | P | D | T | 1.3B | A2*0201  | A11*1101 | B39*3901 | B52*5201 | Cw12*1221 | Cw7*0702 | DR15*1501 | DR8*0801  |
| 27 | HD27 | F | L(CTT) | T(ACC) | P | D | T | 1.3B | A32*3201 | A24*2402 | B14*1402 | B15*1517 | Cw7*0702  | Cw8*0801 | DR7*0701  | DR13*1301 |

|    |      |   |        |        |   |   |   |      |          |          |          |          |           |           |           |           |
|----|------|---|--------|--------|---|---|---|------|----------|----------|----------|----------|-----------|-----------|-----------|-----------|
| 28 | HD28 | F | L(CTT) | T(ACC) | P | D | T | GD1  | A3*0301  | A30*3001 | B35*3501 | B18*1801 | Cw2*0202  | Cw5*0501  | DR3*0301  | DR11*1101 |
| 29 | HD29 | F | L(CTT) | T(ACC) | P | D | T | 1.3B | A24*2402 | A24*2402 | B15*1501 | B7*0705  | Cw3*0303  | Cw15*1502 | DR11*1101 | DR10*1001 |
| 30 | HD30 | F | L(CTT) | T(ACC) | P | D | T | 1.3B | A26*2601 | A11*1101 | B51*5101 | B51*5101 | Cw15*1502 | Cw12*1202 | DR4*0403  | DR14*1401 |
| 31 | HD31 | F | L(CTT) | T(ACC) | P | N | T | 1.3B | A2*0201  | A23*2301 | B7*0702  | B7*0757  | Cw4*0401  | Cw7*0702  | DR11*1101 | DR8*0808  |
| 32 | HD32 | F | L(CTT) | T(ACC) | P | D | T | 1.3B | A2*0201  | A32*3201 | B18*1801 | B18*1801 | Cw2*0201  | Cw7*0701  | DR16*1601 | DR11*1101 |
| 33 | HD33 | M | L(CTT) | T(ACC) | P | N | T | GD1  | A3*0301  | A2*0201  | B15*1501 | B15*1501 | Cw7*0704  | Cw3*0303  | DR7*0701  | DR4*0403  |
| 34 | HD34 | F | L(CTT) | T(ACC) | P | D | T | 1.3B | --       | --       | --       | --       | --        | --        | --        | --        |
| 35 | HD35 | F | L(CTT) | T(ACC) | P | D | T | 1.3B | --       | --       | --       | --       | --        | --        | --        | --        |
| 36 | HD36 | F | L(CTG) | T(ACT) | T | D | I | 1.2  | --       | --       | --       | --       | --        | --        | --        | --        |
| 37 | HD37 | M | L(CTT) | T(ACC) | P | D | T | 1.3B | --       | --       | --       | --       | --        | --        | --        | --        |
| 38 | HD38 | M | L(CTT) | T(ACC) | P | D | T | 1.3B | --       | --       | --       | --       | --        | --        | --        | --        |

|    |       |   |        |        |   |   |   |      |          |          |          |          |           |           |           |           |
|----|-------|---|--------|--------|---|---|---|------|----------|----------|----------|----------|-----------|-----------|-----------|-----------|
| 1a | MS1-1 | F | L(CTG) | T(ACT) | S | D | I | 1.2  | A26*2601 | A32*3201 | B51*5185 | B44*4402 | Cw3*0302  | Cw16*1602 | DR1*0101  | DR7*0701  |
|    | MS1-2 |   | L(CTG) | T(ACT) | S | D | I | 1.2  |          |          |          |          |           |           |           |           |
|    | MS1-3 |   | no seq | T(ACT) | S | D | I | 1.2  |          |          |          |          |           |           |           |           |
| 2  | MS2   | F | L(CTT) | T(ACC) | T | D | T | 1.3A | A24*2402 | A31*3101 | B35*3501 | B7*0714  | Cw7*0702  | Cw12*1202 | DR4*0403  | DR7*0701  |
| 3  | MS3   | M | L(CTT) | T(ACC) | P | N | T | GD1  | A23*2301 | A30*3001 | B18*1801 | B7*0702  | Cw7*0702  | Cw5*0501  | DR15*1501 | DR3*0301  |
| 4a | MS4-1 | M | L(CTG) | T(ACT) | S | D | I | 1.2  | A1*0101  | A32*3201 | B35*3501 | B7*0702  | Cw7*0702  | Cw4*0401  | DR15*1501 | DR1*0101  |
|    | MS4-2 |   | L(CTG) | T(ACT) | S | D | I | 1.2  |          |          |          |          |           |           |           |           |
|    | MS4-3 |   | L(CTG) | T(ACT) | S | D | I | 1.2  |          |          |          |          |           |           |           |           |
| 5a | MS5-1 | M | L(CTG) | T(ACT) | S | D | I | 1.2  | A29*2901 | A2*0201  | B7*0740  | B39*3901 | Cw12*1202 | Cw15*1502 | DR16*1601 | DR15*1501 |
|    | MS5-2 |   | L(CTG) | T(ACT) | S | N | I | 1.2  |          |          |          |          |           |           |           |           |
|    | MS5-3 |   | L(CTG) | T(ACT) | S | D | I | 1.2  |          |          |          |          |           |           |           |           |
| 6a | MS6-1 | F | L(CTG) | T(ACT) | S | D | I | 1.2  | A2*0201  | A24*2402 | B35*3501 | B7*0724  | Cw4*0401  | Cw7*0702  | DR4*0401  | DR12*1201 |
|    | MS6-2 |   | L(CTT) | T(ACC) | P | D | T | 1.3B |          |          |          |          |           |           |           |           |
|    | MS6-3 |   | L(CTT) | T(ACC) | P | D | T | 1.3B |          |          |          |          |           |           |           |           |
| 7a | MS7-1 | F | L(CTG) | T(ACT) | P | D | I | 1.2  | A1*0101  | A11*1101 | B37*3701 | B51*5101 | Cw4*0401  | Cw6*0602  | DR15*1501 | DR4*0403  |

|     |        |   |        |        |        |   |        |      |          |          |          |          |           |          |           |           |  |
|-----|--------|---|--------|--------|--------|---|--------|------|----------|----------|----------|----------|-----------|----------|-----------|-----------|--|
|     | MS7-2  |   | L(CTG) | T(ACT) | P      | N | I      | 1.2  |          |          |          |          |           |          |           |           |  |
| 8a  | MS8-1  | M | L(CTG) | T(ACT) | P      | D | I      | 1.2  | A26*2601 | A24*2402 | B50*5001 | B55*5501 | Cw3*0303  | Cw6*0602 | DR4*0401  | DR7*0701  |  |
|     | MS8-2  |   | L(CTG) | T(ACT) | P      | D | I      | 1.2  |          |          |          |          |           |          |           |           |  |
|     | MS8-3  |   | L(CTG) | T(ACT) | P      | D | I      | 1.2  |          |          |          |          |           |          |           |           |  |
| 9   | MS9    | F | L(CTT) | T(ACC) | P      | D | T      | 1.3B | A3*0301  | A3*0301  | B15*1517 | B35*3501 | Cw4*0401  | Cw7*0701 | DR10*1001 | DR13*1301 |  |
| 10a | MS10-1 | F | L(CTT) | T(ACC) | no seq | D | no seq | 1.2  | A3*0301  | A33*3301 | B58*5801 | B40*4006 | Cw15*1502 | Cw3*0302 | DR16*1601 | DR13*1301 |  |
|     | MS10-2 |   | L(CTT) | T(ACC) | P      | D | T      | GD1  |          |          |          |          |           |          |           |           |  |
|     | MS10-3 |   | L(CTT) | T(ACC) | P      | D | T      | 1.3B |          |          |          |          |           |          |           |           |  |
| 11  | MS11   | M | L(CTG) | T(ACT) | S      | D | I      | 1.2  | A1*0101  | A31*3101 | B15*1517 | B58*5801 | Cw7*0701  | Cw7*0701 | DR13*1301 | DR8*0803  |  |

|    |      |   |        |        |   |   |   |      |          |          |          |          |           |           |           |           |
|----|------|---|--------|--------|---|---|---|------|----------|----------|----------|----------|-----------|-----------|-----------|-----------|
| 25 | MS12 | F | L(CTT) | T(ACC) | P | D | T | 1.3B | A1*0101  | A66*6605 | B8*0814  | B58*5808 | Cw7*0701  | Cw7*0701  | DR3*0301  | DR11*1101 |
| 26 | MS13 | M | L(CTG) | T(ACC) | T | D | I | 1.2  | A1*0101  | A30*3001 | B7*0702  | B8*0801  | Cw7*0701  | Cw7*0704  | DR15*1501 | DR3*0301  |
| 27 | MS14 | F | L(CTT) | T(ACC) | P | N | T | GD1  | A11*1101 | A11*1101 | B35*3502 | B8*0801  | Cw3*0303  | Cw7*0707  | DR14*1401 | DR16*1601 |
| 28 | MS15 | F | L(CTG) | T(ACC) | T | N | I | 1.2  | A24*2402 | A24*2402 | B58*5801 | B7*0705  | Cw7*0702  | Cw3*0302  | DR3*0301  | DR11*1101 |
| 29 | MS16 | F | L(CTT) | T(ACC) | P | D | T | 1.3B | A11*1101 | A30*3001 | B35*3501 | B58*5828 | Cw4*0401  | Cw4*0401  | DR11*1101 | DR11*1101 |
| 30 | MS17 | F | L(CTT) | T(ACC) | P | D | T | 1.3B | A26*2601 | A32*3201 | B35*3501 | B50*5001 | Cw4*0401  | Cw4*0401  | DR1*0101  | DR3*0301  |
| 31 | MS18 | F | L(CTG) | T(ACT) | S | D | I | 1.2  | A24*2402 | A26*2601 | B8*0801  | B41*4101 | Cw17*1701 | Cw7*0701  | DR3*0301  | DR11*1101 |
| 32 | MS19 | F | L(CTG) | T(ACT) | S | D | I | 1.2  | A2*0201  | A23*2301 | B15*1503 | B44*4403 | Cw7*0712  | Cw12*1205 | DR13*1301 | DR7*0701  |
| 33 | MS20 | F | L(CTG) | T(ACT) | S | D | I | 1.2  | --       | --       | --       | --       | --        | --        | --        | --        |
| 34 | MS21 | F | L(CTT) | T(ACC) | P | N | T | 1.3B | A2*0201  | A3*0301  | B7*0702  | B13*1301 | Cw7*0702  | Cw6*0602  | DR3*0301  | DR4*0403  |
| 35 | MS22 | F | L(CTG) | T(ACT) | S | N | I | 1.2  | A1*0101  | A2*0201  | B37*3701 | B58*5801 | Cw6*0602  | Cw7*0701  | DR11*1101 | DR16*1601 |
| 36 | MS23 | F | L(CTT) | T(ACC) | P | N | T | 1.3B | A1*0101  | A3*0301  | B7*0702  | B8*0801  | Cw7*0702  | Cw7*0701  | DR3*0301  | DR11*1103 |
| 37 | MS24 | F | L(CTG) | T(ACT) | T | D | I | 1.2  | A2*0201  | A3*0301  | B41*4101 | B40*4008 | Cw17*1701 | Cw2*0202  | DR15*1501 | DR16*1601 |
| 38 | MS25 | F | L(CTG) | T(ACT) | P | D | I | 1.2  | A2*0201  | A2*0201  | B41*4118 | B37*3721 | Cw17*1701 | Cw6*0602  | DR3*0301  | DR3*0301  |
| 39 | MS26 | M | L(CTG) | T(ACT) | S | N | I | 1.2  | A1*0101  | A1*0101  | B7*0702  | B13*1301 | Cw6*0602  | Cw7*0704  | DR15*1501 | DR15*1501 |
| 40 | MS27 | F | L(CTT) | T(ACC) | P | D | T | 1.3A | A2*0201  | A32*3201 | B35*3503 | B27*2708 | Cw2*0202  | Cw4*0401  | DR15*1501 | DR7*0701  |
| 41 | MS28 | M | L(CTT) | T(ACC) | P | N | T | 1.3B | A3*0301  | A3*0301  | B14*1401 | B15*1501 | Cw3*0304  | Cw8*0801  | DR13*1301 | DR4*0401  |
| 42 | MS29 | F | L(CTG) | T(ACT) | P | D | I | 1.2  | A1*0101  | A2*0201  | B35*3501 | B57*5701 | Cw7*0701  | Cw6*0602  | DR10*1001 | DR7*0701  |

|    |      |   |        |        |   |   |   |      |          |          |          |          |           |           |           |           |
|----|------|---|--------|--------|---|---|---|------|----------|----------|----------|----------|-----------|-----------|-----------|-----------|
| 43 | MS30 | F | L(CTG) | T(ACT) | S | D | I | 1.2  | A26*2601 | A11*1101 | B51*5101 | B51*5101 | Cw15*1502 | Cw12*1202 | DR4*0403  | DR14*1401 |
| 44 | MS31 | F | L(CTT) | T(ACC) | P | D | T | 1.3B | A23*2301 | A30*3001 | B18*1807 | B44*4403 | Cw4*0401  | Cw5*0501  | DR3*0301  | DR11*1101 |
| 45 | MS32 | F | L(CTT) | T(ACC) | P | N | T | 1.3B | A2*0201  | A23*2301 | B7*0702  | B7*0757  | Cw4*0401  | Cw7*0702  | DR11*1101 | DR8*0808  |
| 46 | MS33 | F | L(CTT) | T(ACC) | P | D | T | 1.3B | A2*0201  | A32*3201 | B18*1801 | B18*1801 | Cw2*0201  | Cw7*0701  | DR16*1601 | DR11*1101 |
| 47 | MS34 | F | L(CTG) | T(ACT) | T | N | I | 1.2  | A1*0101  | A3*0301  | B35*3501 | B35*3501 | Cw15*1502 | Cw4*0401  | DR7*0701  | DR16*1601 |
| 48 | MS35 | F | L(CTT) | T(ACC) | P | D | T | 1.3B | A24*2402 | A32*3201 | B51*5185 | B18*1801 | Cw15*1502 | Cw12*1202 | DR15*1501 | DR11*1101 |
| 49 | MS36 | F | L(CTT) | T(ACC) | P | D | T | 1.3A | A3*0301  | A2*0201  | B18*1807 | B7*0702  | Cw4*0401  | Cw7*0702  | DR15*1501 | DR3*0301  |
| 50 | MS37 | M | L(CTT) | T(ACC) | P | D | T | GD1  | A3*0301  | A2*0201  | B15*1501 | B15*1501 | Cw7*0704  | Cw3*0303  | DR7*0701  | DR4*0403  |
| 51 | MS38 | F | L(CTT) | T(ACC) | P | D | T | GD1  | A1*0101  | A1*0101  | B7*0705  | B57*5701 | Cw15*1502 | Cw6*0602  | DR1*0103  | DR7*0701  |
| 52 | MS39 | F | L(CTT) | T(ACC) | P | D | T | 1.3A | A2*0201  | A30*3001 | B44*4402 | B51*5101 | Cw2*0202  | Cw14*1402 | DR16*1601 | DR4*0401  |
| 53 | MS40 | F | L(CTT) | T(ACC) | P | D | T | 1.3B | --       | --       | --       | --       | --        | --        | --        | --        |
| 54 | MS41 | F | L(CTT) | T(ACC) | P | D | T | 1.3B | --       | --       | --       | --       | --        | --        | --        | --        |
| 55 | MS42 | F | L(CTT) | T(ACC) | P | D | T | 1.3B | --       | --       | --       | --       | --        | --        | --        | --        |
| 56 | MS43 | M | L(CTT) | T(ACC) | P | D | T | 1.3B | --       | --       | --       | --       | --        | --        | --        | --        |
| 57 | MS44 | M | L(CTT) | T(ACC) | P | D | T | 1.3B | --       | --       | --       | --       | --        | --        | --        | --        |
| 58 | MS45 | F | L(CTG) | T(ACT) | P | D | I | 1.2  | --       | --       | --       | --       | --        | --        | --        | --        |
| 59 | MS46 | F | L(CTG) | T(ACT) | P | D | I | 1.2  | --       | --       | --       | --       | --        | --        | --        | --        |
| 60 | MS47 | F | L(CTG) | T(ACT) | P | D | I | 1.2  | --       | --       | --       | --       | --        | --        | --        | --        |
| 61 | MS48 | F | L(CTG) | T(ACT) | P | D | I | 1.2  | --       | --       | --       | --       | --        | --        | --        | --        |
| 62 | MS49 | F | L(CTG) | T(ACT) | T | D | I | 1.2  | --       | --       | --       | --       | --        | --        | --        | --        |
| 63 | MS50 | M | L(CTT) | T(ACC) | P | D | T | 1.3B | --       | --       | --       | --       | --        | --        | --        | --        |
| 64 | MS51 | M | L(CTT) | T(ACC) | P | D | T | 1.3B | --       | --       | --       | --       | --        | --        | --        | --        |
| 65 | MS52 | F | L(CTG) | T(ACT) | P | D | I | 1.2  | --       | --       | --       | --       | --        | --        | --        | --        |
| 66 | MS53 | F | L(CTT) | T(ACC) | P | D | T | 1.3A | --       | --       | --       | --       | --        | --        | --        | --        |

<sup>a</sup>Donors with samplings at multiple time points

EBNA2 = Epstein Barr Nuclear Antigen-2; HLA= Human leukocyte antigen; aa = amino acids; MS = multiple sclerosis; HD = healthy donors;

**Table e-2: Clinical data of patients with multiple sclerosis**

|                                |                              |
|--------------------------------|------------------------------|
| Disease type                   | 50 RRMS,<br>2 PPMS<br>1 SPMS |
| Disease duration, years, range | 1-29                         |
| Mean±SD                        | 7.292 ± 0.9546               |
| Median (IQR)                   | 5 (2-11)                     |
| EDSS score range,              | 0-8                          |
| Mean±SD                        | 2.033 ± 0.2875               |
| Median (IQR)                   | 1 (1-3)                      |
| Disease-modifying therapies    | 6 IFN-b, 1 GA, 4 Tysabri     |
| Activity at MRI                | 13/53                        |

RRMS = relapse–remitting; PPMS= primary progressive; SPMS = secondary progressive;

IQR= interquartile range; EDSS=Expanded Disability Status Scale; IFN-b= interferon beta;

GA= glatiramer acetate; MRI= Magnetic resonance imaging

**Table e-3: Variants of the EBV 1.1 allele detected in a post-mortem brain sample from a patient with MS by Illumina MiSeq platform.**

| Nucleotide position <sup>a</sup> | 1.1 (B95-8) | Variants  | Frequency (%) <sup>b</sup> |
|----------------------------------|-------------|-----------|----------------------------|
| 412 (138)                        | AAT (Asn)   | GAT (Asp) | 100                        |
| 529 (177)                        | ACC (Thr)   | ATC (Iso) | 99                         |
| 531 (178)                        | CAC (His)   | TAC (Tyr) | 62                         |
| 714 (238)                        | CTT (Leu)   | CTG (Leu) | 5                          |

<sup>a</sup>Nucleotide position in the *EBNA2* coding sequence (amino acid positions are in parentheses) <sup>b</sup>Frequencies  $\geq 5\%$  were considered.
